# Supplementary material for: Comparison of Selected Immune Parameters in a Single Infection and Co-Infection with Infectious Pancreatic Necrosis Virus with Other Viruses in Rainbow Trout
Source: MDPI journal article supplement (doi:10.3390/pathogens11060658), 2022-06-08
Supplement: s1 [file s1]

**Table S1.** The average percentage of apoptotic cells in each group on selected days

| Dpi | Control | I     | II    | III    | IV    | V     | VI    | VII   |
|-----|---------|-------|-------|--------|-------|-------|-------|-------|
| 1   | 0,00    | 0,00  | 0,832 | 2,942  | 0,00  | 0,828 | 0,472 | 0,572 |
| 3   | 0,07    | 0,066 | 5,578 | 0,472  | 0,126 | 0,470 | 0,280 | 0,692 |
| 7   | 0,01    | 4,028 | 6,324 | 37,675 | 2,270 | 0,494 | 0,768 | 0,328 |
| 9   | 0,18    | 0,22  | 0,536 | 1,400  | 0,154 | 2,750 | 7,562 | 1,414 |
| 11  | 0,36    | 0,668 | 2,344 | 11,120 | 1,422 | 0,882 | 1,396 | 0,980 |
| 15  | 0,01    | 0,576 | 3,696 | 4,286  | 2,282 | 1,826 | 1,740 | 0,464 |
| 18  | 0,06    | 4,790 | 7,128 | 7,583  | 5,554 | 0,832 | 0,310 | 0,372 |
| 21  | 0,54    | 9,032 | 2,988 | 5,563  | 6,988 | 1,496 | 1,235 | 3,094 |

**Table S2.** The average percentage of necrotic cells in each group on selected days

| Dpi | Control | I     | II     | III   | IV    | V     | VI     | VII   |
|-----|---------|-------|--------|-------|-------|-------|--------|-------|
| 1   | 0,00    | 0,00  | 0,638  | 2,716 | 0,00  | 0,54  | 0,774  | 0,612 |
| 3   | 0,68    | 2,478 | 0,502  | 0,466 | 1,322 | 0,274 | 0,39   | 0,41  |
| 7   | 0,03    | 1,086 | 0,91   | 1,17  | 0,578 | 0,854 | 3,134  | 1,26  |
| 9   | 0,46    | 1,02  | 0,41   | 0,385 | 1,034 | 1,05  | 1,392  | 0,546 |
| 11  | 0,06    | 1,124 | 39,416 | 7,278 | 0,842 | 0,428 | 1,216  | 0,406 |
| 15  | 0,14    | 0,556 | 3,063  | 1,803 | 0,74  | 1,684 | 2,725  | 0,614 |
| 18  | 0,23    | 0,708 | 0,798  | 2,21  | 1,318 | 0,496 | 0,375  | 0,408 |
| 21  | 0,42    | 0,454 | 1,196  | 1,437 | 0,302 | 1,294 | 14,545 | 1,611 |

**Table S3.** Results were obtained by calculated relative quantification for IFN gene in Groups I, II, III, IV, V, VI, and VII and control group in internal organs: kidney, liver, spleen, heart, gill, and brain.

|               | <b>kidney</b> | <b>liver</b> | <b>spleen</b> | <b>heart</b> | <b>gill</b> | <b>brain</b> |
|---------------|---------------|--------------|---------------|--------------|-------------|--------------|
| Group I       | 0,04          | 0,04         | 0,16          | 0,08         | 0,30        | 0,16         |
| Group II      | 3,90          | 0,38         | 1,52          | 0,6          | 1,23        | 0,81         |
| Group III     | 3,14          | 1,86         | 2,34          | 7,75         | 3,87        | 5,38         |
| Group IV      | 0,19          | 0,07         | 0,31          | 0,14         | 0,32        | 0,21         |
| Group V       | 0,20          | 0,08         | 0,10          | 0,05         | 0,15        | 0,16         |
| Group VI      | 0,67          | 0,19         | 2,56          | 3,60         | 1,44        | 4,80         |
| Group VII     | 0,59          | 0,17         | 1,26          | 0,47         | 1,75        | 0,80         |
| Control group | 1             | 1            | 1             | 1            | 1           | 1            |

**Table S4.** Results were obtained by calculated relative quantification for TLR-3 gene in Groups I, II, III, IV, V, VI, VII and control group in internal organs: kidney, liver, spleen, heart, gill, brain

|               | <b>kidney</b> | <b>liver</b> | <b>spleen</b> | <b>heart</b> | <b>gill</b> | <b>brain</b> |
|---------------|---------------|--------------|---------------|--------------|-------------|--------------|
| Group I       | 7,96          | 6,01         | 15,67         | 4,60         | 13,95       | 7,79         |
| Group II      | 11,47         | 3,14         | 13,45         | 4,49         | 9,43        | 6,34         |
| Group III     | 5,13          | 0,74         | 1,25          | 2,84         | 6,33        | 6,73         |
| Group IV      | 17,26         | 1,84         | 2,79          | 1,43         | 1,76        | 1,59         |
| Group V       | 9,77          | 15,47        | 12,08         | 1,99         | 17,38       | 17,67        |
| Group VI      | 4,89          | 1,90         | 19,21         | 7,14         | 12,44       | 20,82        |
| Group VII     | 23,47         | 9,85         | 36,68         | 7,15         | 29,41       | 12,78        |
| Control group | 1             | 1            | 1             | 1            | 1           | 1            |

**Table S5.** The standard deviation for IFN  $\Delta\Delta Ct$ 

|           | <b>kidney</b> | <b>liver</b> | <b>spleen</b> | <b>heart</b> | <b>gills</b> | <b>brain</b> |
|-----------|---------------|--------------|---------------|--------------|--------------|--------------|
| Group I   | 3,372192      | 3,350979     | 1,90141       | 2,551948     | 1,213395     | 1,883732     |
| Group II  | 1,389465      | 0,997728     | 0,426385      | 0,528916     | 0,210718     | 0,210011     |
| Group III | 1,16814       | 0,630739     | 0,866206      | 2,088793     | 1,380272     | 1,716148     |
| Group IV  | 1,684328      | 2,68347      | 1,19996       | 1,970707     | 1,157534     | 1,613618     |
| Group V   | 1,629174      | 2,589425     | 2,306582      | 3,009446     | 1,943129     | 1,876661     |
| Group VI  | 0,412243      | 1,697056     | 0,95813       | 1,305319     | 0,373352     | 1,600183     |
| Group VII | 0,537401      | 1,800294     | 0,235467      | 0,771453     | 0,568514     | 0,221324     |

**Table S6.** The standard deviation for TLR-3  $\Delta\Delta Ct$ 

|           | <b>kidney</b> | <b>liver</b> | <b>spleen</b> | <b>heart</b> | <b>gills</b> | <b>brain</b> |
|-----------|---------------|--------------|---------------|--------------|--------------|--------------|
| Group I   | 2,116371      | 1,829285     | 2,807214      | 1,556342     | 2,68842      | 2,093743     |
| Group II  | 2,489016      | 1,166019     | 2,650943      | 1,533008     | 2,289612     | 1,883732     |
| Group III | 1,668065      | 0,311834     | 0,231224      | 1,064903     | 1,882318     | 1,945251     |
| Group IV  | 2,905502      | 0,622254     | 1,045811      | 0,362039     | 0,576292     | 0,47164      |
| Group V   | 2,325674      | 2,793779     | 2,542049      | 0,702864     | 2,912573     | 2,929543     |
| Group VI  | 1,618567      | 0,656902     | 3,015103      | 2,004648     | 2,571747     | 3,097128     |
| Group VII | 3,219457      | 2,333452     | 3,674834      | 2,006062     | 3,449267     | 2,599325     |
